# Supplementary material
Source: MDPI journal article supplement (https://www.mdpi.com/2073-4344/9/5/486)
Supplement: s1 [file s1]

# Supporting Information: Facile Mechanochemical Synthesis of Nickel/Graphene Oxide Nanocomposites with Unique and Tunable Morphology: Applications in Heterogeneous Catalysis and Supercapacitors

Mayakrishnan Gopiraman,<sup>1</sup> Somasundaram Saravanamoorthy,<sup>2</sup> Andivelu Ilangovan,<sup>2</sup> Ill Min Chung<sup>1,\*</sup>

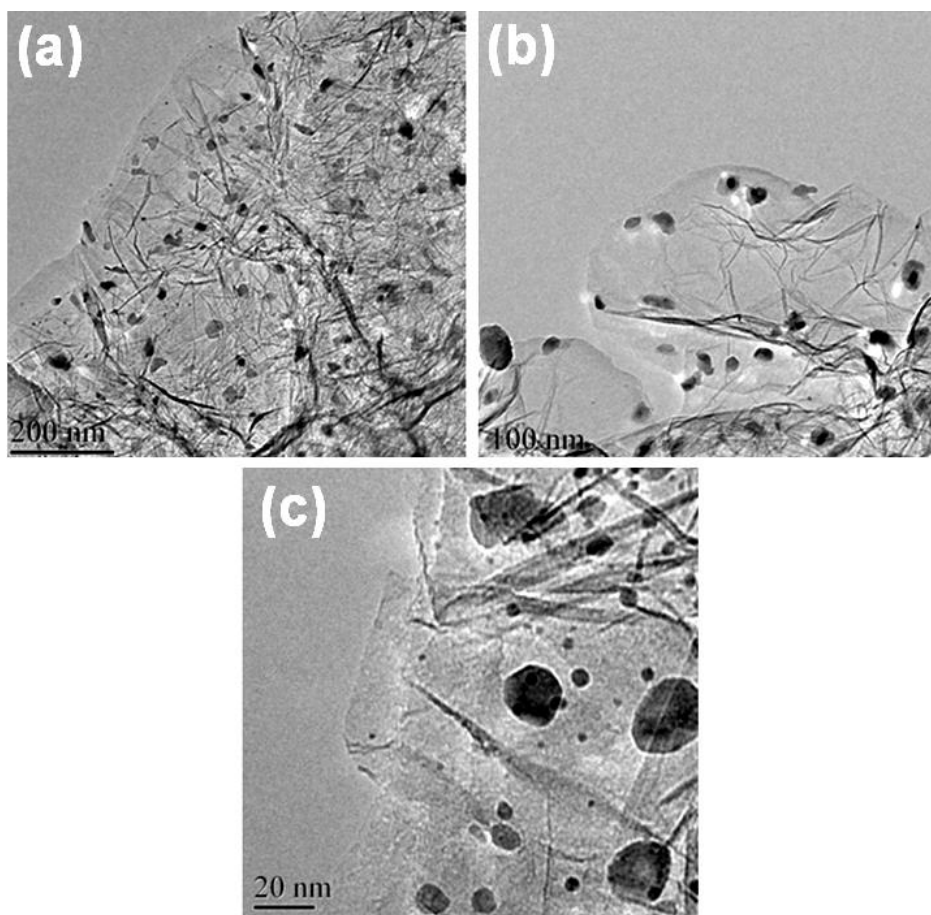

Figure S1. TEM images and Ni/GO-3 with Ni wt % of 15.

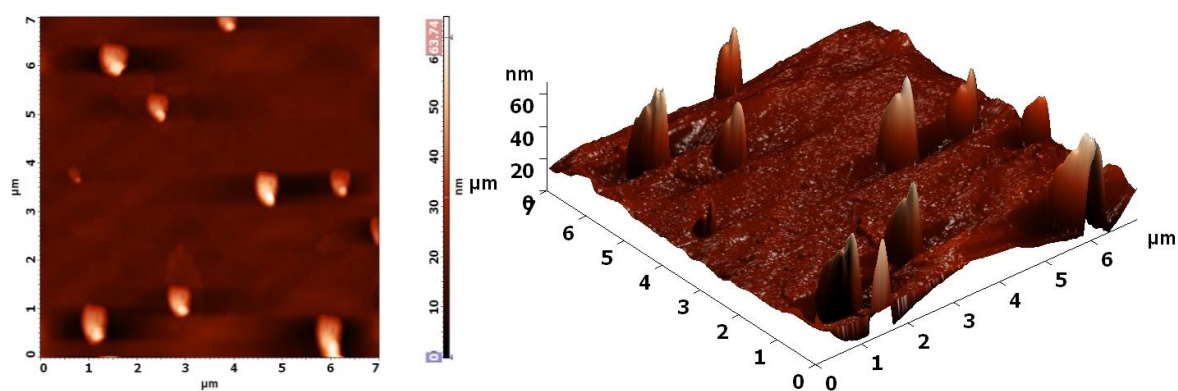

Figure S2. AFM images of Ni/GO with 15 wt % of Ni (Ni/GO-3); performed directly on the surface of samples and their three-dimensional projections.

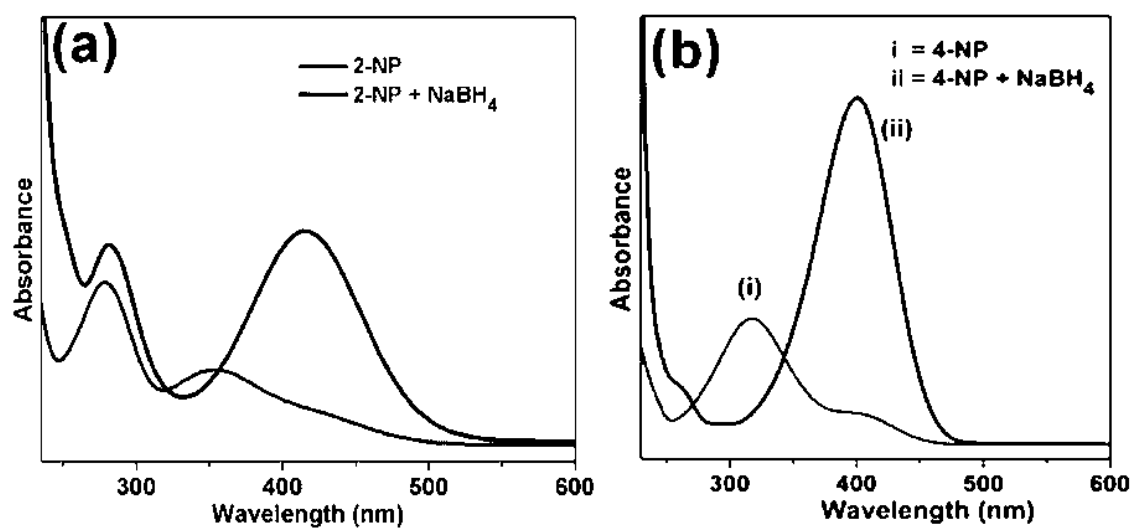

Figure S3. UV-vis spectra of (a) 2-NP and (b) 4-NP before and after adding NaBH<sub>4</sub> solution.
